# Supplementary material for: Clinical and Radiological Outcomes of Anteromedial Portal Versus Transtibial Technique in ACL Reconstruction: A Systematic Review
Source: PubMed Central journal article supplement — Orthop J Sports Med. 2021 Jul 2;9(7):23259671211024591. doi: 10.1177/23259671211024591 (PMC8255613; doi:10.1177/23259671211024591), 2021-07-02
Supplement: sj-pdf-1-ojs-10.1177_23259671211024591.pdf [file sj-pdf-1-ojs-10.1177_23259671211024591.pdf]

## SUPPLEMENTAL MATERIAL

Supplemental Table S1. Methodological quality of the studies

| Study (Year)                         | Randomized adequately <sup>a</sup> | Allocation concealed | Patient blinded | Care provider blinded | Outcome assessor blinded | Acceptable dropout rate <sup>b</sup> | ITT analysis <sup>c</sup> | Avoided selective reporting | Similar baseline | Similar or avoided cofactor | Patient compliance <sup>d</sup> | Similar timing | Overall Quality <sup>e</sup> |
|--------------------------------------|------------------------------------|----------------------|-----------------|-----------------------|--------------------------|--------------------------------------|---------------------------|-----------------------------|------------------|-----------------------------|---------------------------------|----------------|------------------------------|
| <b>Clinical Studies</b>              |                                    |                      |                 |                       |                          |                                      |                           |                             |                  |                             |                                 |                |                              |
| Alentorn-Geli (2010) <sup>3</sup>    | No                                 | No                   | No              | No                    | Yes                      | Yes                                  | No                        | Yes                         | Yes              | Yes                         | Yes                             | Unsure         | Mod                          |
| Azboy (2014) <sup>6</sup>            | No                                 | No                   | No              | No                    | No                       | Yes                                  | No                        | Yes                         | Yes              | Yes                         | Yes                             | Yes            | Mod                          |
| Basdelioglul (2019) <sup>7</sup>     | No                                 | No                   | No              | No                    | No                       | Yes                                  | No                        | Yes                         | Yes              | Yes                         | Yes                             | Yes            | Mod                          |
| Eysturoy (2019) <sup>15</sup>        | No                                 | No                   | No              | No                    | No                       | Yes                                  | No                        | Yes                         | Yes              | Yes                         | Yes                             | Yes            | Mod                          |
| Franceschi (2013) <sup>17</sup>      | No                                 | No                   | No              | No                    | No                       | Yes                                  | No                        | Yes                         | Yes              | Yes                         | Yes                             | Yes            | Mod                          |
| Geng (2018) <sup>21</sup>            | Yes                                | Yes                  | Yes             | No                    | Yes                      | Yes                                  | No                        | Yes                         | Yes              | Yes                         | Yes                             | Yes            | Hgh                          |
| Guglielmetti (2016) <sup>24</sup>    | Yes                                | Yes                  | Yes             | No                    | Yes                      | Yes                                  | No                        | Yes                         | Yes              | Yes                         | Yes                             | Yes            | Hgh                          |
| Guler (2016) <sup>25</sup>           | No                                 | No                   | No              | No                    | No                       | Yes                                  | No                        | Yes                         | Yes              | Yes                         | Yes                             | Yes            | Mod                          |
| Jamsher (2020) <sup>29</sup>         | No                                 | No                   | No              | No                    | No                       | Unsure                               | No                        | Yes                         | Yes              | Yes                         | Yes                             | Yes            | Mod                          |
| Mardani-Kivi (2012) <sup>45</sup>    | No                                 | No                   | No              | No                    | No                       | Yes                                  | No                        | Yes                         | Unsure           | Yes                         | Yes                             | Yes            | Mod                          |
| Osti (2015) <sup>50</sup>            | No                                 | No                   | No              | No                    | No                       | Yes                                  | No                        | Yes                         | Yes              | Yes                         | Yes                             | Yes            | Mod                          |
| Ozel (2017) <sup>51</sup>            | No                                 | No                   | No              | No                    | No                       | Yes                                  | No                        | Yes                         | Yes              | Yes                         | Yes                             | Yes            | Mod                          |
| Rezazadeh (2016) <sup>56</sup>       | No                                 | No                   | No              | No                    | No                       | Unsure                               | No                        | Yes                         | Yes              | Yes                         | Yes                             | Yes            | Mod                          |
| Stone (2019) <sup>71</sup>           | No                                 | No                   | No              | No                    | No                       | Yes                                  | No                        | Yes                         | Yes              | Yes                         | Yes                             | Yes            | Mod                          |
| Sukur (2016) <sup>72</sup>           | No                                 | No                   | No              | No                    | No                       | Yes                                  | No                        | Yes                         | Yes              | Yes                         | Yes                             | Yes            | Mod                          |
| Tasdemir (2015) <sup>74</sup>        | No                                 | No                   | No              | No                    | No                       | Yes                                  | No                        | Yes                         | Yes              | Yes                         | Yes                             | Yes            | Mod                          |
| Tucciarone (2019) <sup>76</sup>      | Yes                                | Yes                  | Yes             | No                    | Unsure                   | Yes                                  | No                        | Yes                         | Yes              | Yes                         | Yes                             | Yes            | Hgh                          |
| Tudisco (2015) <sup>78</sup>         | No                                 | No                   | No              | No                    | No                       | Unsure                               | No                        | Yes                         | Yes              | Yes                         | Yes                             | Yes            | Mod                          |
| Kim (2011) <sup>31</sup>             | No                                 | No                   | No              | No                    | No                       | Yes                                  | No                        | Yes                         | Yes              | Yes                         | Yes                             | Yes            | Mod                          |
| Koutras (2013) <sup>35</sup>         | No                                 | No                   | No              | Unsure                | No                       | Unsure                               | No                        | Yes                         | Yes              | Yes                         | Yes                             | Yes            | Mod                          |
| MacDonald (2018) <sup>43</sup>       | Yes                                | Yes                  | Yes             | No                    | Yes                      | Yes                                  | No                        | Yes                         | Yes              | Yes                         | Yes                             | Yes            | Hgh                          |
| Mandal (2012) <sup>44</sup>          | No                                 | No                   | No              | No                    | No                       | Yes                                  | No                        | Yes                         | Yes              | Yes                         | Yes                             | Yes            | Mod                          |
| Zhang (2012) <sup>88</sup>           | Yes                                | Yes                  | No              | No                    | Yes                      | Yes                                  | No                        | Yes                         | Yes              | Yes                         | Yes                             | Yes            | Hgh                          |
| Hussein (2012) <sup>28</sup>         | Yes                                | Yes                  | No              | Unsure                | Yes                      | Yes                                  | No                        | Yes                         | Yes              | Yes                         | Yes                             | Yes            | Hgh                          |
| Lee (2014) <sup>37</sup>             | No                                 | No                   | No              | No                    | No                       | Yes                                  | No                        | Yes                         | Yes              | Yes                         | Yes                             | Yes            | Mod                          |
| <b>Radiological Studies</b>          |                                    |                      |                 |                       |                          |                                      |                           |                             |                  |                             |                                 |                |                              |
| Abebe (2009) <sup>1</sup>            | No                                 | No                   | No              | No                    | No                       | Yes                                  | No                        | Yes                         | Yes              | Yes                         | Yes                             | Yes            | Mod                          |
| Ahn (2013) <sup>2</sup>              | No                                 | No                   | No              | No                    | No                       | Unsure                               | No                        | Yes                         | Yes              | Yes                         | Yes                             | Yes            | Mod                          |
| Dargel (2009) <sup>12</sup>          | No                                 | No                   | No              | No                    | No                       | Unsure                               | No                        | Yes                         | Yes              | Yes                         | Unsure                          | Yes            | Mod                          |
| Hantes (2009) <sup>26</sup>          | No                                 | No                   | No              | No                    | Yes                      | Yes                                  | No                        | Yes                         | Yes              | Yes                         | Yes                             | Yes            | Mod                          |
| Noh (2013) <sup>48</sup>             | Yes                                | Yes                  | Unsure          | Unsure                | Yes                      | Yes                                  | No                        | Yes                         | Yes              | Yes                         | Yes                             | Yes            | Hgh                          |
| Özer (2018) <sup>52</sup>            | No                                 | No                   | No              | No                    | No                       | Yes                                  | No                        | Yes                         | Yes              | Yes                         | Yes                             | Yes            | Mod                          |
| Pascual-Garrido (2013) <sup>53</sup> | No                                 | No                   | No              | No                    | No                       | Yes                                  | No                        | Yes                         | Yes              | Yes                         | Yes                             | Yes            | Mod                          |
| Schairer (2011) <sup>63</sup>        | No                                 | No                   | No              | No                    | No                       | Unsure                               | No                        | Yes                         | Yes              | Yes                         | Unsure                          | Yes            | Mod                          |
| Shetty (2016) <sup>66</sup>          | No                                 | No                   | No              | No                    | No                       | Yes                                  | No                        | Yes                         | Yes              | Yes                         | Yes                             | Yes            | Mod                          |
| Song (2014) <sup>70</sup>            | No                                 | No                   | No              | Unsure                | No                       | Unsure                               | No                        | Yes                         | Yes              | Yes                         | Yes                             | Yes            | Mod                          |
| Vermesan (2015) <sup>80</sup>        | No                                 | No                   | No              | No                    | No                       | Yes                                  | No                        | Yes                         | Yes              | Yes                         | Yes                             | Yes            | Mod                          |
| Yau (2013) <sup>84</sup>             | No                                 | No                   | No              | No                    | No                       | Yes                                  | No                        | Yes                         | Yes              | Yes                         | Yes                             | Yes            | Mod                          |
| Venosa (2017) <sup>79</sup>          | Yes                                | Yes                  | Yes             | No                    | Yes                      | Yes                                  | No                        | Yes                         | Yes              | Yes                         | Yes                             | Yes            | Hgh                          |
| Wang (2013) <sup>83</sup>            | No                                 | No                   | No              | No                    | No                       | Yes                                  | No                        | Yes                         | Yes              | Yes                         | Yes                             | Yes            | Mod                          |

ITT, intention to treat; Mod, moderate.

<sup>a</sup>"Yes" response indicates only if the method of sequence made was explicitly introduced.<sup>b</sup>"Yes" response indicates dropout rate <20%.<sup>c</sup>"Yes" response indicates all randomized participants were analyzed in the group they were allocated to.<sup>d</sup>"Yes" response indicates intermittent therapy or treatment duration >6 months.<sup>e</sup>High = "yes" responses on >7 items; moderate = "yes" responses on >4 but ≤7 items; low = "yes" response on ≤4 items.

**Supplemental Table S2. Study Characteristics**

| Lead Author (Year)                | Study design                 | LOE | N    | Number of patients |      | Implant          | Source                        | Mean Age (Range, years) -TT |                        | Mean time from injury to surgery (months) |             | Sex, male:female, n |         | Minimum/Mean Follow-up (Range, Months) |              |
|-----------------------------------|------------------------------|-----|------|--------------------|------|------------------|-------------------------------|-----------------------------|------------------------|-------------------------------------------|-------------|---------------------|---------|----------------------------------------|--------------|
|                                   |                              |     |      | TT                 | AM   |                  |                               | TT                          | AM                     | TT                                        | AM          | TT                  | AM      |                                        |              |
| <b>Clinical Studies</b>           |                              |     |      |                    |      |                  |                               |                             |                        |                                           |             |                     |         |                                        |              |
| Alentorn-Geli (2010) <sup>3</sup> | Retrospective, nonrandomized | III | 47   | 21                 | 26   | BPTB             | Autologous                    | 27.5                        | 26.4                   | 2.0                                       | 3.0         | 21:0                | 26:0    | 24                                     | 24           |
| Azboy (2014) <sup>6</sup>         | Retrospective, nonrandomized | III | 64   | 34                 | 30   | Hamstring        | Autologous                    | 27.6                        | 26.5                   | NA                                        | NA          | 33:1                | 29:1    | 24.6                                   | 20.4         |
| Basdelioglu (2019) <sup>7</sup>   | Retrospective, nonrandomized | III | 30   | 14                 | 16   | Hamstring        | NA                            | 27.2 ± 7.04                 | 29.4 ± 8.82            | 6.5                                       | 9           | 12:2                | 15:1    | 17.1 ± 6.48                            | 17.1 ± 6.48  |
| Eysturoy (2019) <sup>15</sup>     | Retrospective, nonrandomized | III | 8818 | 1413               | 7405 | BPTB / Hamstring | NA                            | <20: 339;<br>>20: 1074      | <20: 1813<br>>20: 5592 | NA                                        | NA          | 4567:2838           | 849:564 | 37 (12-61)                             |              |
| Franceschi (2013) <sup>17</sup>   | Retrospective, nonrandomized | III | 88   | 46                 | 42   | Hamstring        | Autologous                    | 29                          | 28                     | 8                                         | 8           | 39:7                | 34:8    | 78.1 ± 5.3                             | 75.6 ± 4.8   |
| Geng (2018) <sup>21</sup>         | Prospective randomized       | I   | 104  | 48                 | 56   | Hamstring        | Autologous                    | 31.8 ± 11.0                 | 29.6 ± 11.7            | 10.6 ± 6.8                                | 9.8 ± 6.3   | 40:8                | 46:10   | 24.9 ± 6.0                             | 25.7 ± 6.8   |
| Guglielmetti (2016) <sup>24</sup> | Prospective randomized       | II  | 71   | 34                 | 37   | Hamstring        | Autologous                    | NA                          | NA                     | NA                                        | NA          | NA                  | NA      | NA                                     | NA           |
| Guler (2016) <sup>25</sup>        | Retrospective, nonrandomized | III | 48   | 25                 | 23   | Hamstring        | Autologous                    | 31.4 ± 4.1                  | 30.9 ± 3.7             | NA                                        | NA          | 25:0                | 22:1    | 19.7                                   | 18.4         |
| Jamsher (2020) <sup>29</sup>      | Retrospective, nonrandomized | III | 72   | 18                 | 37   | Hamstring        | Autologous                    | 32.9 ± 9.3                  | 33.4 ± 12.6            | NA                                        | NA          | 14:4                | 27:9    | 6                                      | NA           |
| Mardani-Kivi (2012) <sup>45</sup> | Retrospective, nonrandomized | III | 124  | 60                 | 64   | Hamstring        | Autologous                    | 28.48 ± 8.3                 |                        | NA                                        | NA          | 107:17              |         | 12                                     | NA           |
| Osti (2015) <sup>50</sup>         | Retrospective cohort         | III | 100  | 36                 | 32   | Hamstring        | Autologous                    | 32.93 ± 10.32               |                        | NA                                        | NA          | 74:26               |         | NA                                     | NA           |
| Ozel (2017) <sup>51</sup>         | Retrospective, nonrandomized | III | 80   | 38                 | 42   | Hamstring        | Autologous                    | 31.2 ± 5.2                  | 29.6 ± 4.3             | NA                                        | NA          | 41:1                | 38:0    | 45                                     | 36.4         |
| Rezazadeh (2016) <sup>56</sup>    | Retrospective, nonrandomized | III | 94   | 44                 | 50   | Hamstring        | Autologous                    | 30.0 ± 6.5                  | 30.6 ± 6.5             | NA                                        | NA          | 40:4                | 45:5    | 25.7                                   | 18.2         |
| Stone (2019) <sup>71</sup>        | Prospective cohort           | II  | 29   | 15                 | 14   | BPTB             | Autologous                    | 23.79 ± 3.29                | 24.26 ± 3.62           | 6.33 ± 12.56                              | 1.57 ± 1.34 | 11:4                | 11:3    | 66.85 ± 9.01                           | 66.08 ± 6.89 |
| Sukur (2016) <sup>72</sup>        | Retrospective, nonrandomized | III | 105  | 49                 | 56   | Hamstring        | Autologous                    | 25.5 ± 5.0                  | 26.8 ± 5.7             | 10.3 ± 5.1                                | 10.6 ± 4.7  | 52:4                | 45:4    | 30.1 ± 5.4                             | 30.9 ± 5.6   |
| Tasdemir (2015) <sup>74</sup>     | Retrospective, nonrandomized | III | 43   | 12                 | 21   | Hamstring        | Autologous                    | 29.73 ± 6.33                | 29.04±7.53             | NA                                        | NA          | 13:2                | 20:4    | 23.13 ± 3.52                           | 24.96 ± 5.73 |
| Tucciarone (2019) <sup>76</sup>   | Prospective randomized       | II  | 20   | 10                 | 10   | Hamstring        | Autologous                    | NA                          | NA                     | NA                                        | NA          | NA                  | NA      | NA                                     | NA           |
| Tudisco (2015) <sup>78</sup>      | Retrospective, nonrandomized | III | 43   | 20                 | 23   | Hamstring        | NA                            | 31 ( 22-38)                 | 27 (19-38)             | NA                                        | NA          | NA                  | NA      | 82 ± 11                                | 27 ± 12      |
| Kim (2011) <sup>31</sup>          | Retrospective, nonrandomized | III | 66   | 33                 | 33   | BPTB             | 53 allograft/<br>13 autograft | 30.3 (19-51)                | 29.8 (17-58)           | NA                                        | NA          | 23:10               | 25:8    | 32                                     | 20.8         |
| Koutras (2013) <sup>35</sup>      | Prospective cohort           | II  | 51   | 36                 | 15   | Hamstring        | Autologous                    | 24.9                        | 21.5                   | NA                                        | NA          | NA                  | NA      | 6                                      |              |
| MacDonald (2018) <sup>43</sup>    | Prospective randomized       | I   | 96   | 39                 | 45   | Hamstring        | Autologous                    | 32.4 ± 8.9                  | 30.7 ± 9.3             | NA                                        | NA          | 27:15               | 31:15   | 24                                     |              |
| Mandal (2012) <sup>44</sup>       | Retrospective cohort         | III | 31   | 13                 | 18   | Hamstring        | Autologous                    | NA                          | NA                     | NA                                        | NA          | NA                  | NA      | 12                                     |              |
| Zhang (2012) <sup>88</sup>        | Prospective randomized       | II  | 65   | 34                 | 31   | Hamstring        | Autologous                    | 28.0                        | NA                     | NA                                        | NA          | 56:20               |         | 12                                     |              |
| Hussein (2012) <sup>28</sup>      | Prospective randomized       | I   | 150  | 72                 | 78   | Hamstring        | Autologous                    | 32.6                        | 34.2                   | NA                                        | NA          | NA                  | NA      | 39                                     |              |

|                                      |                              |     |     |    |    |                                                         |            |              |               |     |     |      |      |              |              |
|--------------------------------------|------------------------------|-----|-----|----|----|---------------------------------------------------------|------------|--------------|---------------|-----|-----|------|------|--------------|--------------|
| Lee (2014) <sup>37</sup>             | Retrospective, nonrandomized | III | 104 | 52 | 52 | Hamstring                                               | NA         | NA           | NA            | NA  | NA  | NA   | NA   | 24           |              |
| <b>Radiological studies</b>          |                              |     |     |    |    |                                                         |            |              |               |     |     |      |      |              |              |
| Abebe (2009) <sup>1</sup>            | Retrospective, nonrandomized | III | 16  | 8  | 8  | NA                                                      | NA         | 34.5 ± 11.6  | 30.6 ± 3.5    | NA  | NA  | 5:3  | 5:3  | NA           | NA           |
| Ahn (2013) <sup>2</sup>              | Retrospective, nonrandomized | III | 69  | 34 | 35 | Hamstring                                               | Autologous | 30.06 ± 8.32 | 29.77 ± 10.11 | NA  | NA  | 25:9 | 29:6 | 8            |              |
| Dargel (2009) <sup>12</sup>          | Retrospective, nonrandomized | III | 70  | 35 | 35 | BPTB / Hamstring                                        | Autologous | NA           | NA            | NA  | NA  | NA   | NA   | NA           | NA           |
| Hantes (2009) <sup>26</sup>          | Retrospective, nonrandomized | III | 56  | 30 | 26 | Hamstring                                               | Autologous | 25.6         | 27.2          | NA  | NA  | 28:2 | 26:4 | 18.4 (15-26) | 22.6 (17-28) |
| Noh (2013) <sup>48</sup>             | Prospective randomized       | I   | 61  | 30 | 31 | Achilles tendon                                         | Allograft  | 24.0         | 22.0          | 1.8 | 1.5 | NA   | NA   | 24           | NA           |
| Özer (2018) <sup>52</sup>            | Retrospective, nonrandomized | III | 67  | 33 | 34 | Hamstring                                               | Autologous | 28.17 ± 5.61 | 28.07 ± 7.42  | NA  | NA  | 30:0 | 28:2 | 12           | NA           |
| Pascual-Garrido (2013) <sup>53</sup> | Retrospective, nonrandomized | III | 40  | 17 | 23 | BPTB / Hamstring                                        | Autologous | NA           | NA            | NA  | NA  | NA   | NA   | NA           | NA           |
| Schairer (2011) <sup>63</sup>        | Retrospective, nonrandomized | III | 21  | 9  | 12 | BPTB / Hamstring / Posterior tibialis / Achilles tendon |            | 30 ± 7.9     | 32 ± 8.8      | NA  | NA  | 5:4  | 5:7  | 18 ± 5       | 12 ± 8       |
| Shetty (2016) <sup>66</sup>          | Retrospective, nonrandomized | III | 60  | 30 | 30 | NA                                                      | NA         | NA           | NA            | NA  | NA  | NA   | NA   | NA           | NA           |
| Song (2014) <sup>70</sup>            | Prospective cohort           | II  | 60  | 30 | 30 | Hamstring                                               | Autologous | NA           | NA            | NA  | NA  | NA   | NA   | NA           | NA           |
| Vermesan (2015) <sup>80</sup>        | Retrospective, nonrandomized | III | 29  | 19 | 21 | BPTB / Hamstring                                        | Autologous | NA           | NA            | NA  | NA  | NA   | NA   | NA           | NA           |
| Yau (2013) <sup>84</sup>             | Retrospective, nonrandomized | III | 39  | 20 | 19 | Hamstring                                               | Autologous | 25.4 ± 6.1   | 25.6 ± 9.4    | NA  | NA  | 18:3 | 21:0 | 12           |              |
| Venosa (2017) <sup>79</sup>          | Prospective randomized       | I   | 52  | 26 | 26 | Hamstring                                               | Autologous | 26.4 (16-40) | 25.2 (16-40)  | NA  | NA  | 18:8 | 20:6 | 12           |              |
| Wang (2013) <sup>83</sup>            | Retrospective, nonrandomized | III | 24  | 12 | 12 | Hamstring                                               | NA         | 32.75 ± 7.2  | 29.6 ± 7.2    | NA  | NA  | 7:5  | 7:5  | NA           | NA           |

AM, anteromedial; BPTB, bone–patellar tendon–bone; LOE, level of evidence; NA, not available; TT, transtibial.

Supplemental Table S3. Summary of clinical outcomes

| Study (Year)                      | Drilling techniques | No. of patients with negative Lachman test | No. of patients with negative pivot-shift test | KT-1000 manual maximum displacement (mm) | Lysholm score | Tegner Score | IKDC grade/score | SSD side-to-side difference | VAS for satisfaction with surgery | Time From Surgery to Return to Play (mo) |
|-----------------------------------|---------------------|--------------------------------------------|------------------------------------------------|------------------------------------------|---------------|--------------|------------------|-----------------------------|-----------------------------------|------------------------------------------|
| Alentorn-Geli (2010) <sup>3</sup> | TT                  | 11                                         | 7                                              | 1.9 ± 1.8                                | 97.1 ± 7.2    | 7.1 ± 1.3    | 19A/B            | -                           | 8.6 ± 1.6                         | 8 (9–11.5)                               |
|                                   | AM                  | 21                                         | 19                                             | 0.2 ± 1.6                                | 99.3 ± 2.3    | 7.8 ± 1.6    | 26A/B            | -                           | 9.1 ± 1.3                         | 7 (7–8.75)                               |
| Azboy (2014) <sup>6</sup>         | TT                  | 27                                         | 26                                             | -                                        | 78.4          | 6.1 ± 1.0    | 31A/B            | -                           | 8.2 ± 1.1                         | 8.7 (7–11)                               |
|                                   | AM                  | 25                                         | 26                                             | -                                        | 83.7          | 6.7 ± 1.2    | 28A/B            | -                           | 8.9 ± 0.9                         | 7.2 (6–10)                               |
| Basdelioglu (2019) <sup>7</sup>   | TT                  | -                                          | -                                              | -                                        | 92.4 ± 4.4    | -            | 90.02 ± 4.43     | -                           | -                                 | -                                        |
|                                   | AM                  | -                                          | -                                              | -                                        | 96.7 ± 3.3    | -            | 94.67 ± 4.65     | -                           | -                                 | -                                        |
| Eysturoy (2019) <sup>15</sup>     | TT                  | -                                          | 86                                             | -                                        | -             | 4.7          | -                | -                           | -                                 | -                                        |
|                                   | AM                  | -                                          | 669                                            | -                                        | -             | 5.2          | -                | -                           | -                                 | -                                        |
| Franceschi (2013) <sup>17</sup>   | TT                  | 25                                         | 23                                             | 2.7 ± 2.2                                | 92.3 ± 6.9    | -            | 44A/B            | -                           | -                                 | -                                        |
|                                   | AM                  | 35                                         | 36                                             | 1.7 ± 1.6                                | 94.0 ± 6.8    | -            | 42A/B            | -                           | -                                 | -                                        |
| Geng (2018) <sup>21</sup>         | TT                  | 36                                         | 32                                             | 1.6 ± 0.8                                | 91.6 ± 6.5    | 6.3 ± 1.4    | 87.4 ± 10.0      | -                           | -                                 | -                                        |
|                                   | AM                  | 44                                         | 44                                             | 1.5 ± 0.9                                | 93.3 ± 5.0    | 6.8 ± 1.4    | 89.5 ± 8.8       | -                           | -                                 | -                                        |
| Guglielmetti (2016) <sup>24</sup> | TT                  | 24                                         | 26                                             | 1.44                                     | 91.32         | -            | 90.65            | -                           | -                                 | -                                        |
|                                   | AM                  | 30                                         | 30                                             | 1.23                                     | 92.81         | -            | 92.65            | -                           | -                                 | -                                        |
| Guler (2016) <sup>25</sup>        | TT                  | -                                          | -                                              | -                                        | 84.36         | -            | -                | -                           | -                                 | -                                        |
|                                   | AM                  | -                                          | -                                              | -                                        | 88.28         | -            | -                | -                           | -                                 | -                                        |
| Mardani-Kivi (2012) <sup>45</sup> | TT                  | 38                                         | -                                              | -                                        | 92.2 ± 4.1    | -            | 89.2 ± 4.1       | -                           | 9.53 ± 0.5                        | 11.72 ± 1.98                             |
|                                   | AM                  | 47                                         | -                                              | -                                        | 96.1 ± 3.0    | -            | 94.8 ± 3.9       | -                           | 9.78 ± 0.4                        | 14.57 ± 3.02                             |
| Ozel (2017) <sup>51</sup>         | TT                  | -                                          | -                                              | 4.4 ± 2.1                                | 90.6 ± 10.3   | 4.7 ± 2.0    | -                | -                           | -                                 | -                                        |
|                                   | AM                  | -                                          | -                                              | 2.8 ± 1.8                                | 91.7 ± 9.9    | 5.5 ± 1.4    | -                | -                           | -                                 | -                                        |
| Stone (2019) <sup>71</sup>        | TT                  | 15                                         | 15                                             | -                                        | -             | -            | -                | -                           | -                                 | -                                        |
|                                   | AM                  | 13                                         | 13                                             | -                                        | -             | -            | -                | -                           | -                                 | -                                        |
| Sukur (2016) <sup>72</sup>        | TT                  | 29                                         | 29                                             | -                                        | 93.9          | 6.1          | 91.4             | -                           | 8.9 ± 0.8                         | 14.4 ± 2.2                               |
|                                   | AM                  | 42                                         | 42                                             | -                                        | 95.4          | 6.3          | 93.1             | -                           | 9.4 ± 0.8                         | 12.4 ± 1.6                               |
| Tasdemir (2015) <sup>74</sup>     | TT                  | 0                                          | 0                                              | 11 < 3 mm, 4 3-5mm                       | 82 (59–95)    | -            | 79 (62–86)       | -                           | -                                 | -                                        |
|                                   | AM                  | 0                                          | 0                                              | 21 < 3mm, 3 3-5 mm                       | 85 (68–90)    | -            | 82 (76–85)       | -                           | -                                 | -                                        |
| Tucciarone (2019) <sup>76</sup>   | TT                  | -                                          | -                                              | -                                        | -             | 8.1          | -                | -                           | -                                 | 7.9 (7-10)                               |
|                                   | AM                  | -                                          | -                                              | -                                        | -             | 8.9          | -                | -                           | -                                 | 6.8 (6-9)                                |
| Tudisco (2015) <sup>78</sup>      | TT                  | -                                          | -                                              | -                                        | 80.9 ± 12.3   | -            | 73.14 ± 13.20    | -                           | -                                 | -                                        |
|                                   | AM                  | -                                          | -                                              | -                                        | 84.9 ± 14.4   | -            | 78.53 ± 14.96    | -                           | -                                 | -                                        |
| Kim (2011) <sup>31</sup>          | TT                  | 27                                         | 26                                             | -                                        | 77.2 ± 19.3   | -            | 31A/B            | 9.6 ± 0.9                   | -                                 | -                                        |
|                                   | AM                  | 28                                         | 30                                             | -                                        | 88.3 ± 13.1   | -            | 32A/B            | 9.0 ± 0.5                   | -                                 | -                                        |
| Koutras (2013) <sup>35</sup>      | TT                  | -                                          | -                                              | -                                        | 98.8 ± 2.1    | -            | -                | -                           | -                                 | -                                        |
|                                   | AM                  | -                                          | -                                              | -                                        | 99.0 ± 2      | -            | -                | -                           | -                                 | -                                        |
| MacDonald (2018) <sup>43</sup>    | TT                  | -                                          | 21                                             | -                                        | -             | -            | 33A/B            | -                           | -                                 | -                                        |
|                                   | AM                  | -                                          | 24                                             | -                                        | -             | -            | 41A/B            | -                           | -                                 | -                                        |
| Mandal (2012) <sup>44</sup>       | TT                  | 3                                          | -                                              | -                                        | -             | -            | 12A/B            | -                           | -                                 | 7.5                                      |
|                                   | AM                  | 12                                         | -                                              | -                                        | -             | -            | 18A/B            | -                           | -                                 | 6.2                                      |
| Zhang (2012) <sup>88</sup>        | TT                  | -                                          | -                                              | 2.1 ± 0.9                                | 94.5 ± 1.1    | -            | -                | -                           | -                                 | -                                        |
|                                   | AM                  | -                                          | -                                              | 1.9 ± 1.0                                | 95.1 ± 1.0    | -            | -                | -                           | -                                 | -                                        |
| Hussein (2012) <sup>28</sup>      | TT                  | -                                          | 30                                             | 2.0 ± 0.9                                | 90.9 ± 7.0    | -            | 90.2 ± 7.6       | -                           | -                                 | -                                        |
|                                   | AM                  | -                                          | 52                                             | 1.6 ± 0.8                                | 91.8 ± 4.3    | -            | 90.6 ± 6.4       | -                           | -                                 | -                                        |
| Lee (2014) <sup>37</sup>          | TT                  | 40                                         | 41                                             | 1.6 ± 1.4                                | 91.3 ± 8.9    | -            | 78.6 ± 12.5      | -                           | -                                 | -                                        |
|                                   | AM                  | 38                                         | 39                                             | 1.6 ± 1.4                                | 89.9 ± 8.1    | -            | 75.9 ± 14.4      | -                           | -                                 | -                                        |
| Noh (2013) <sup>48</sup>          | TT                  | 17                                         | 20                                             | 2.7 ± 2.1                                | 91.0 ± 5.8    | -            | 26A/B            | -                           | -                                 | -                                        |
|                                   | AM                  | 25                                         | 27                                             | 1.4 ± 1.6                                | 94.5 ± 11.9   | -            | 30A/B            | -                           | -                                 | -                                        |
| Wang (2013) <sup>83</sup>         | TT                  | -                                          | -                                              | -                                        | -             | -            | 72.1 ± 10.8      | -                           | -                                 | -                                        |
|                                   | AM                  | -                                          | -                                              | -                                        | -             | -            | 72.6 ± 14.7      | -                           | -                                 | -                                        |

Supplemental Table S4: Radiographic Outcomes

| Study                                | Imaging  | Tunnel center from the center of the ACL attachment |                | Femoral graft angle (FGA) |                  | Tibial graft angle (TGA) |                    | ACL angle     |               | Diameter of tibial/femoral tunnel |               | Length of tibial/femoral tunnel (mm) |            | KOOS score   |              | Tunnel widening (mm) |           |
|--------------------------------------|----------|-----------------------------------------------------|----------------|---------------------------|------------------|--------------------------|--------------------|---------------|---------------|-----------------------------------|---------------|--------------------------------------|------------|--------------|--------------|----------------------|-----------|
|                                      |          | AM                                                  | TT             | AM                        | TT               | AM                       | TT                 | AM            | TT            | AM                                | TT            | AM                                   | TT         | AM           | TT           | AM                   | TT        |
| Eysturoy (2019) <sup>15</sup>        | -        | -                                                   | -              | -                         | -                | -                        | -                  | -             | -             | -                                 | -             | -                                    | -          | 70           | 70.3         | -                    | -         |
| Geng (2018) <sup>21</sup>            | 3D CT    | -                                                   | -              | -                         | -                | -                        | -                  | -             | -             | -                                 | -             | 37.3 ± 3.9                           | 42.0 ± 4.8 | -            | -            | -                    | -         |
| Guler (2016) <sup>25</sup>           | MRI      | -                                                   | -              | 46.8°                     | 70.04°           | 57.78°                   | 58.87°             | -             | -             | -                                 | -             | -                                    | -          | -            | -            | -                    | -         |
| Jamsher (2020) <sup>29</sup>         | MRI      | -                                                   | -              | 69.3 ± 4.5°               | 73.1 ± 5.3°      | 49.9 ± 5.0°              | 58.9 ± 5.3°        | -             | -             | -                                 | -             | -                                    | -          | -            | -            | -                    | -         |
| Osti (2015) <sup>50</sup>            | CT       | -                                                   | -              | 27.76°                    | -                | 66.90° ± 6.67°           | -                  | -             | -             | -                                 | -             | 33.35 ± 6.67                         | -          | -            | -            | -                    | -         |
| Ozel (2017) <sup>51</sup>            | -        | -                                                   | -              | -                         | -                | -                        | -                  | -             | -             | -                                 | -             | -                                    | -          | -            | -            | 1.2 ± 0.47           | 3.0 ± 0.9 |
| Stone (2019) <sup>71</sup>           | MRI      | -                                                   | -              | 48.06° ± 4.74°            | 57.28 ± 9.29     | 67.43 ± 6.66             | 62.61 ± 7.03       | -             | -             | -                                 | -             | -                                    | -          | 97.90 ± 3.49 | 95.59 ± 9.60 | -                    | -         |
| Tucciarone (2019) <sup>76</sup>      | -        | -                                                   | -              | -                         | -                | -                        | -                  | -             | -             | -                                 | -             | -                                    | -          | -            | -            | -                    | -         |
| Tudisco (2015) <sup>78</sup>         | X-ray    | -                                                   | -              | -                         | -                | -                        | -                  | -             | -             | -                                 | -             | -                                    | -          | 87.94 ± 9.40 | 82.38 ± 7.74 | -                    | -         |
| Kim (2011) <sup>31</sup>             | X-ray    | -                                                   | -              | 31°                       | 59°              | -                        | -                  | -             | -             | -                                 | -             | -                                    | -          | -            | -            | -                    | -         |
| MacDonald (2018) <sup>43</sup>       | X-ray    | -                                                   | -              | 43°                       | 58°              | -                        | -                  | -             | -             | -                                 | -             | -                                    | -          | -            | -            | -                    | -         |
| Abebe (2009) <sup>1</sup>            | MRI      | 3.2 ± 1.0 mm                                        | 8.5 ± 2.1 mm   | -                         | -                | -                        | -                  | -             | -             | -                                 | -             | -                                    | -          | -            | -            | -                    | -         |
| Ahn (2013) <sup>2</sup>              | 3D CT    | 18.08% ± 7.38%                                      | 38.20% ± 7.15% | -                         | -                | -                        | -                  | -             | -             | -                                 | -             | -                                    | -          | -            | -            | -                    | -         |
| Dargel (2009) <sup>12</sup>          | X-ray    | 59.4 ± 3.4%                                         | 55.2 ± 6.0%    | -                         | -                | -                        | -                  | -             | -             | -                                 | -             | -                                    | -          | -            | -            | -                    | -         |
| Hantes (2009) <sup>26</sup>          | MRI      | -                                                   | -              | 53° (46°-59°)             | 71° (66°-76°)    | 63° (57°-66°)            | 64° (57°-67°)      | 51° (46°-56°) | 52° (45°-56°) | -                                 | -             | -                                    | -          | -            | -            | -                    | -         |
| Noh (2013) <sup>48</sup>             | MRI      | -                                                   | -              | -                         | -                | -                        | -                  | -             | -             | -                                 | -             | 42 (38-44)                           | 49 (46-54) | -            | -            | -                    | -         |
| Özer (2018) <sup>52</sup>            | Xray     | -                                                   | -              | -                         | -                | -                        | -                  | -             | -             | 37.76 ± 5.0%                      | 45.32 ± 3.45% | -                                    | -          | -            | -            | -                    | -         |
| Pascual-Garrido (2013) <sup>53</sup> | MRI      | -                                                   | -              | 50° ± 6°                  | 58° ± 9°         | 54° ± 6°                 | 59° ± 12°          | -             | -             | -                                 | -             | -                                    | -          | -            | -            | -                    | -         |
| Schairer (2011) <sup>63</sup>        | MRI      | -                                                   | -              | -                         | -                | -                        | -                  | -             | -             | -                                 | -             | -                                    | -          | -            | -            | -                    | -         |
| Shetty (2016) <sup>66</sup>          | X-ray    | -                                                   | -              | 38.4 ± 8.75°              | 46.97 ± 12.75°   | -                        | -                  | -             | -             | -                                 | -             | -                                    | -          | -            | -            | -                    | -         |
| Vermesan (2015) <sup>80</sup>        | MRI & CT | -                                                   | -              | 72.38° (69°-76°)          | 75.47° (72°-78°) | 54.5° (51°-58.5°)        | 63.68° (59°-69.5°) | -             | -             | -                                 | -             | -                                    | -          | -            | -            | -                    | -         |
| Yau (2013) <sup>84</sup>             | MRI      | -                                                   | -              | -                         | -                | -                        | -                  | -             | -             | -                                 | -             | -                                    | -          | -            | -            | -                    | -         |
| Venosa (2017) <sup>79</sup>          | 3D-CT    | -                                                   | -              | -                         | -                | -                        | -                  | -             | -             | -                                 | -             | 34.7 ± 3.5                           | 40.7 ± 4.0 | -            | -            | -                    | -         |

**Supplemental Table S5. Other characteristics**

| Lead Author (Year)                | Revision rate |              | Postoperative complications |                | Stability              |                        | Recovery time from surgery |             | Operative time (min) |            | ACL quality of life (ACL-QOL) |     | Intraoperative complications |        | Fairbank 1-2 degenerative changes (osteorthritis) |        |
|-----------------------------------|---------------|--------------|-----------------------------|----------------|------------------------|------------------------|----------------------------|-------------|----------------------|------------|-------------------------------|-----|------------------------------|--------|---------------------------------------------------|--------|
|                                   | TT            | AM           | TT                          | AM             | TT                     | AM                     | TT                         | AM          | TT                   | AM         | TT                            | AM  | TT                           | AM     | TT                                                | AM     |
| Alentorn-Geli (2010) <sup>3</sup> | -             | -            | -                           | -              | -                      | significantly improved | 3 (2-3.5)                  | 2 (1.5-3)   | -                    | -          | -                             | -   | -                            | -      | -                                                 | -      |
| Azboy (2014) <sup>6</sup>         | No revisions  | -            | Infection 2.9%              | Infection 3.3% | -                      | -                      | -                          | -           | 49 ( 39-76)          | 58 (42-80) | -                             | -   | -                            | -      | -                                                 | -      |
| Eysturoy (2019) <sup>15</sup>     | 3.0%          | 2.9%         | -                           | -              | -                      | -                      | -                          | -           | -                    | -          | -                             | -   | -                            | -      | -                                                 | -      |
| Franceschi (2013) <sup>17</sup>   | 6.50%         | 0%           | -                           | -              | -                      | -                      | -                          | -           | -                    | -          | -                             | -   | 13%*                         | 11.9%* | 28.20%                                            | 11.90% |
| Guglielmetti (2016) <sup>24</sup> | 9.0%          | 8.0%         | -                           | Infection 1.2% | -                      | -                      | -                          | -           | -                    | -          | -                             | -   | -                            | -      | -                                                 | -      |
| Mardani-Kivi (2012) <sup>45</sup> | -             | -            | -                           | -              | -                      | -                      | 7.14 ± 1.44                | 8.68 ± 1.80 | -                    | -          | -                             | -   | -                            | -      | -                                                 | -      |
| Stone (2019) <sup>71</sup>        | 0%            | 7%           | -                           | -              | 13% showed instability | 14% showed instability | -                          | -           | -                    | -          | -                             | -   | -                            | -      | -                                                 | -      |
| Tucciarone (2019) <sup>76</sup>   | No revisions  | No revisions | -                           | -              | -                      | -                      | -                          | -           | -                    | -          | -                             | -   | -                            | -      | -                                                 | -      |
| MacDonald (2018) <sup>43</sup>    | No revisions  | No revisions | -                           | -              | -                      | -                      | -                          | -           | -                    | -          | 79%                           | 78% | -                            | -      | -                                                 | -      |

\*Neurosensory disturbances caused by the damage to the infrapatellar branch of the internal saphenous nerve.
